# Supplementary material
Source: PubMed Central journal article supplement (PMC3205246)
Supplement: NIHMS301231-supplement-01.pdf [file NIHMS301231-supplement-01.pdf]

## **3-Bromohomofascaplysin A, a fascaplysin analogue from a Fijian**

### ***Didemnum* sp. ascidian—Supporting Information**

Zhenyu Lu,<sup>a</sup> Yuanqing Ding,<sup>b</sup> Xing-Cong Li,<sup>b</sup> Daignon R. Djigbenou,<sup>c,d</sup> Brian T. Grimberg,<sup>d</sup> Daneel Ferreira,<sup>b</sup> Chris M. Ireland,<sup>a</sup> and Ryan M. Van Wagoner<sup>a,\*</sup>

<sup>a</sup>*Department of Medicinal Chemistry, University of Utah, Salt Lake City, UT 84112, USA*

<sup>b</sup>*Department of Pharmacognosy and National Center for Natural Products Research, School of Pharmacy, University of Mississippi, University, MS 38677, USA*

<sup>c</sup>*Division of Infectious Disease and* <sup>d</sup>*Center for Global Health & Diseases, Case Western Reserve University, Cleveland, OH 44106, USA*

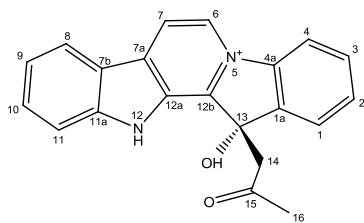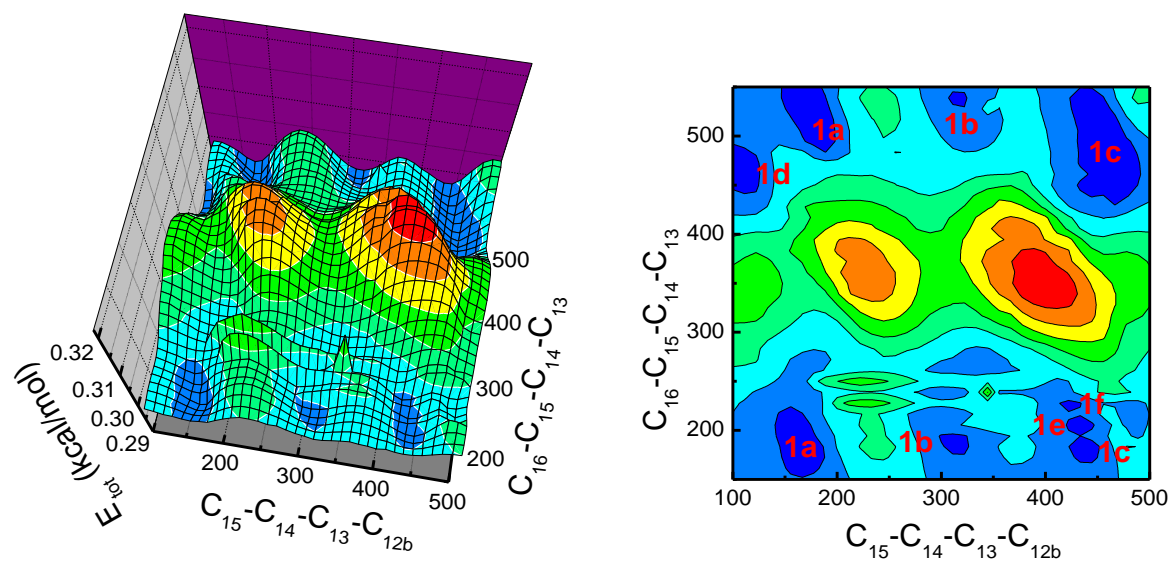

**Figure S-1.** Potential energy surface of compound **2** at the AM1 level in the gas phase.

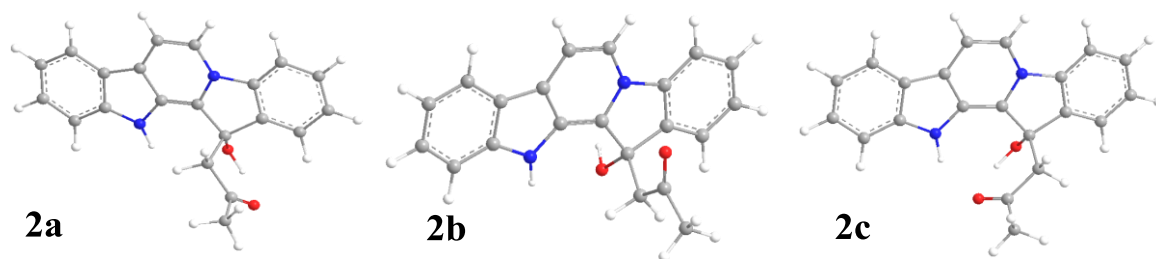

**Figure S-2.** Optimized geometries of individual conformers of compound **2** at the B3LYP/6-31G\*\* level in the gas phase.

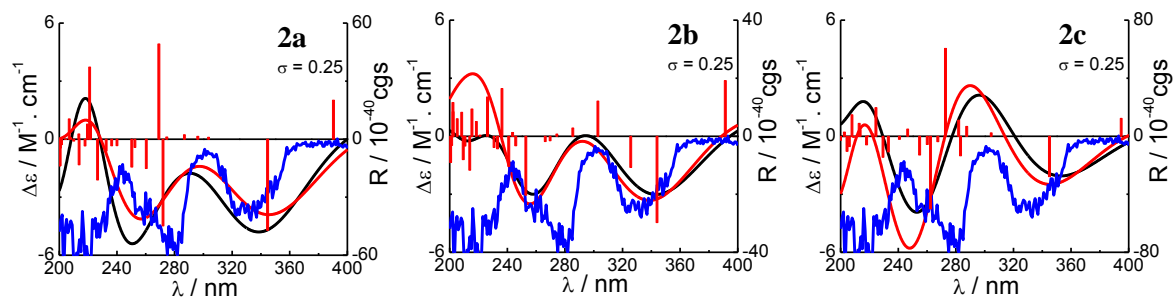

**Figure S-3.** Experimental and calculated ECD spectra of compound **2** (blue-experimental ECD in MeOH; black- calculated at the B3LYP/6-31G\*\* level in the gas phase; red- calculated at the B3LYP-SCRF/6-31G\*\*//B3LYP/6-31G\*\* level with COSMO in MeOH).

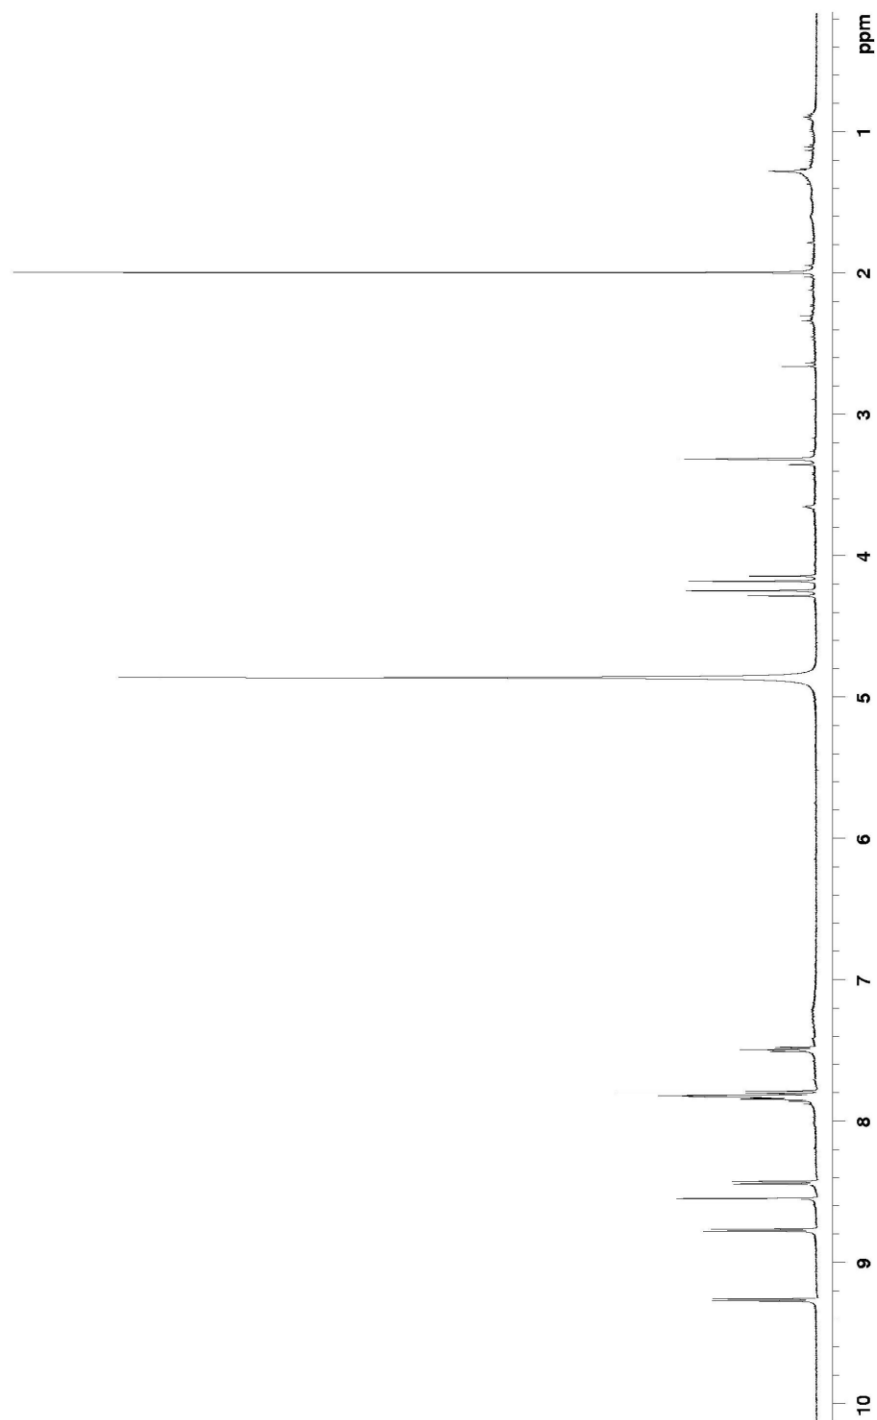

**Figure S-4.**  $^1\text{H}$  NMR spectrum of 3-bromohomofascaplysin (**1**) in methanol- $d_4$  at 500 MHz.

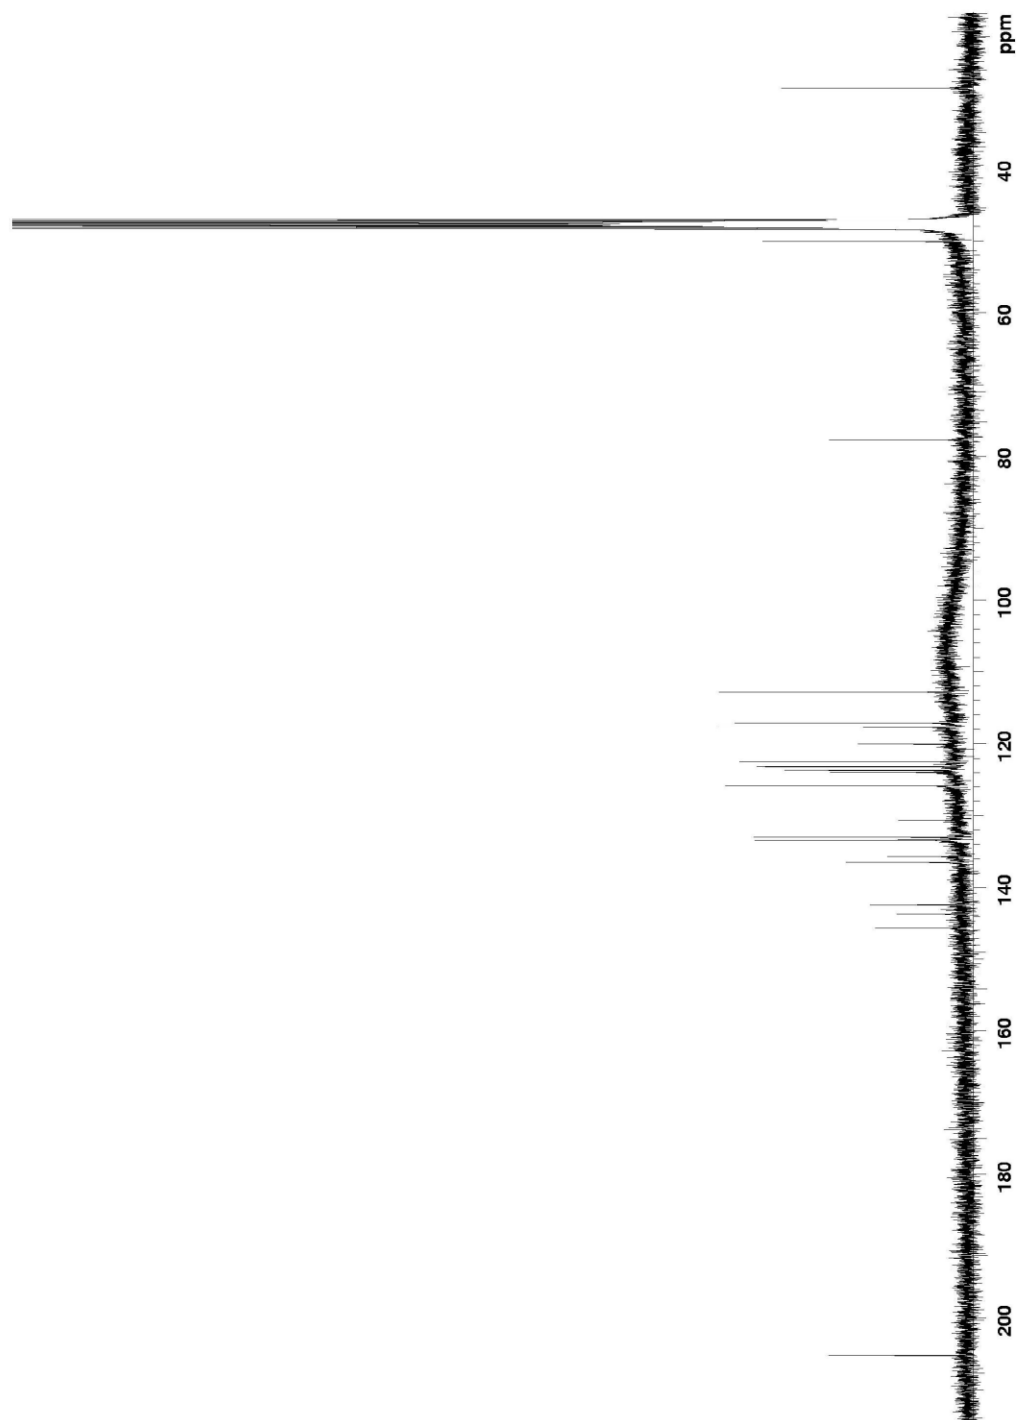

**Figure S-5.**  $^{13}\text{C}$  NMR spectrum of 3-bromohomofascaplysin (**1**) in methanol- $d_4$  at 100 MHz.

**Table S-1.** Important Thermodynamic Parameters of Conformers of Compound **2** (au).

| Species   | In Gas Phase  |              |              |              | In Methanol   |
|-----------|---------------|--------------|--------------|--------------|---------------|
|           | $E$           | $E'=E+ZPE$   | $H$          | $G$          | $E_s$         |
| <b>2a</b> | -1070.2779145 | -1069.941808 | -1069.921432 | -1069.989415 | -1070.3489139 |
| <b>2b</b> | -1070.2731356 | -1069.937993 | -1069.917127 | -1069.986347 | -1070.3461257 |
| <b>2c</b> | -1070.278921  | -1069.943082 | -1069.922628 | -1069.990854 | -1070.3491905 |

$E$ ,  $E'$ ,  $H$ ,  $G$ : total energy, total energy with zero point energy ( $ZPE$ ), enthalpy and Gibbs free energy, respectively, in the gas phase at B3LYP/6-31G\*\* level;  $E_s$ : single point energy in MeOH at the B3LYP-SCRF/6-31G\*\*//B3LYP/6-31G\*\* level with COSMO model.

**Table S-2.** Conformational Analysis of Conformers of Compound **2**

| Species   | In Gas Phase |                      |               |                         | In Methanol    |                          |
|-----------|--------------|----------------------|---------------|-------------------------|----------------|--------------------------|
|           | $\Delta E^a$ | $P_E\%$ <sup>b</sup> | $\Delta E'^c$ | $P_{E'}\%$ <sup>d</sup> | $\Delta E_s^e$ | $P_{E_s}\%$ <sup>f</sup> |
| <b>2a</b> | 0.63         | 25.6                 | 0.80          | 20.5                    | 0.17           | 41.8                     |
| <b>2b</b> | 3.63         | 0.2                  | 3.19          | 0.4                     | 1.92           | 2.2                      |
| <b>2c</b> | 0.00         | 74.3                 | 0.00          | 79.1                    | 0.00           | 56.0                     |

<sup>a,c</sup> Relative energy and relative energy with  $ZPE$  at the B3LYP/6-31G\*\* level in the gas phase, respectively (kcal/mol).

<sup>b,d</sup> Conformational distribution calculated by using the respective parameters above at the B3LYP/6-31G\*\* level in the gas phase.

<sup>e,f</sup> Relative energy (kcal/mol) and conformational distribution in MeOH at the B3LYP-SCRF/6-31G\*\*//B3LYP/6-31G\*\* level with the COSMO model, respectively.

**Table S-3.** Important Dihedral Angles (degrees) and Hydrogen Bond Lengths (Å) in Conformers of Compound **2**.

|           | C-15-C-14-C-13-C-12b | C-16-C-15-C-14-C-13 | (C-15)O...H-O(C-13) | (C15)O...H-N-12 |
|-----------|----------------------|---------------------|---------------------|-----------------|
| <b>2a</b> | 175°                 | 160°                | 1.88 Å              | 4.56 Å          |
| <b>2b</b> | -55°                 | -168°               | 4.83 Å              | 4.54 Å          |
| <b>2c</b> | 79°                  | -174°               | 1.96 Å              | 1.93 Å          |

**Tabel S-4.** Optimized Z-Matrix of Conformers of Compound **2** at the B3LYP/6-31G\*\* Level in the Gas Phase.

| <b>2a</b> |           |           |           | <b>2b</b> |           |           |           |
|-----------|-----------|-----------|-----------|-----------|-----------|-----------|-----------|
| C         | -0.014915 | -0.142792 | -0.278294 | C         | -3.946783 | 0.257541  | -0.954956 |
| C         | -0.091836 | -0.160798 | 1.120009  | C         | -4.930376 | -0.686959 | -0.633422 |
| C         | 1.056296  | -0.036141 | 1.907293  | C         | -4.589038 | -1.896568 | -0.019747 |
| C         | 2.319873  | 0.093341  | 1.321798  | C         | -3.257818 | -2.204971 | 0.285989  |
| C         | 2.367993  | 0.096476  | -0.064215 | C         | -2.306463 | -1.252886 | -0.046699 |
| N         | 3.535135  | 0.154515  | -0.907630 | N         | -0.882137 | -1.320039 | 0.133666  |
| C         | 4.838430  | 0.205921  | -0.516556 | C         | -0.182900 | -2.349002 | 0.681729  |
| C         | 5.848042  | 0.143533  | -1.457777 | C         | 1.193326  | -2.278030 | 0.768317  |
| C         | 5.515411  | -0.010055 | -2.812175 | C         | 1.848242  | -1.146556 | 0.265319  |
| C         | 6.252591  | -0.173775 | -4.032289 | C         | 3.221419  | -0.740651 | 0.153658  |
| C         | 7.624802  | -0.220801 | -4.338269 | C         | 4.441155  | -1.334299 | 0.523770  |
| C         | 8.000989  | -0.433518 | -5.653998 | C         | 5.617776  | -0.654659 | 0.246599  |
| C         | 7.031678  | -0.600703 | -6.666834 | C         | 5.593531  | 0.604237  | -0.394056 |
| C         | 5.669023  | -0.554444 | -6.395973 | C         | 4.402531  | 1.215135  | -0.770127 |
| C         | 5.291445  | -0.335414 | -5.070255 | C         | 3.217422  | 0.529750  | -0.486590 |
| N         | 4.014017  | -0.232681 | -4.526544 | N         | 1.907179  | 0.905700  | -0.740782 |
| C         | 4.129353  | -0.059570 | -3.172364 | C         | 1.068804  | -0.089162 | -0.306942 |
| C         | 3.151203  | 0.069218  | -2.213671 | C         | -0.307452 | -0.174158 | -0.332411 |
| C         | 1.641008  | 0.094640  | -2.348085 | C         | -1.364219 | 0.787771  | -0.868467 |
| C         | 1.233588  | -0.009154 | -0.873940 | C         | -2.624767 | -0.037087 | -0.651024 |
| C         | 1.188487  | 1.456387  | -2.957658 | C         | -1.390824 | 2.147380  | -0.142275 |
| C         | -0.312700 | 1.521643  | -3.247511 | C         | -1.548494 | 2.107341  | 1.369112  |
| C         | -0.917759 | 2.888527  | -3.426169 | C         | -1.846883 | 3.427037  | 2.036787  |
| O         | 1.279790  | -0.978809 | -3.191719 | O         | -1.105901 | 1.123594  | -2.229030 |
| O         | -0.979132 | 0.499739  | -3.341185 | O         | -1.433620 | 1.067047  | 1.999837  |
| H         | -0.909769 | -0.241917 | -0.882312 | H         | -4.213659 | 1.194124  | -1.434378 |
| H         | -1.058142 | -0.276039 | 1.599516  | H         | -5.969856 | -0.477703 | -0.863825 |
| H         | 0.972857  | -0.048787 | 2.988675  | H         | -5.365129 | -2.614516 | 0.223936  |
| H         | 3.208148  | 0.175744  | 1.938222  | H         | -3.002409 | -3.146129 | 0.759301  |



|           |           |           |           |   |           |           |           |
|-----------|-----------|-----------|-----------|---|-----------|-----------|-----------|
| H         | 5.024789  | 0.285057  | 0.545220  | H | -0.752910 | -3.198554 | 1.030165  |
| H         | 6.878501  | 0.188768  | -1.125872 | H | 1.735497  | -3.104439 | 1.211901  |
| H         | 8.371744  | -0.096230 | -3.560912 | H | 4.459389  | -2.302391 | 1.014222  |
| H         | 9.052764  | -0.474737 | -5.914995 | H | 6.571653  | -1.091657 | 0.522992  |
| H         | 7.359827  | -0.768785 | -7.687536 | H | 6.531959  | 1.110528  | -0.598333 |
| H         | 4.933481  | -0.682310 | -7.182861 | H | 4.391862  | 2.182297  | -1.260896 |
| H         | 3.153399  | -0.523837 | -4.969779 | H | 1.628802  | 1.703727  | -1.293980 |
| H         | 0.323260  | -0.864070 | -3.362906 | H | -1.176832 | 0.319032  | -2.767360 |
| H         | 1.704061  | 1.613171  | -3.915343 | H | -2.192698 | 2.750229  | -0.583274 |
| H         | 1.478443  | 2.291309  | -2.310886 | H | -0.464722 | 2.693062  | -0.365440 |
| H         | -0.298997 | 3.511303  | -4.080948 | H | -2.873433 | 3.727975  | 1.794998  |
| H         | -1.926694 | 2.800422  | -3.829620 | H | -1.745702 | 3.330889  | 3.118508  |
| H         | -0.960771 | 3.394839  | -2.453740 | H | -1.186225 | 4.215123  | 1.661835  |
| <b>2c</b> |           |           |           |   |           |           |           |
| C         | -4.133109 | 0.147498  | -0.626938 |   |           |           |           |
| C         | -5.097898 | -0.848604 | -0.439782 |   |           |           |           |
| C         | -4.736725 | -2.117317 | 0.024999  |   |           |           |           |
| C         | -3.402574 | -2.433406 | 0.300013  |   |           |           |           |
| C         | -2.467763 | -1.427447 | 0.097325  |   |           |           |           |
| N         | -1.039331 | -1.495374 | 0.244472  |   |           |           |           |
| C         | -0.333169 | -2.608880 | 0.579338  |   |           |           |           |
| C         | 1.044700  | -2.577207 | 0.594517  |   |           |           |           |
| C         | 1.697269  | -1.388227 | 0.250110  |   |           |           |           |
| C         | 3.071344  | -1.003574 | 0.132146  |   |           |           |           |
| C         | 4.290700  | -1.679532 | 0.324999  |   |           |           |           |
| C         | 5.469116  | -0.985173 | 0.111922  |   |           |           |           |
| C         | 5.450373  | 0.369131  | -0.290561 |   |           |           |           |
| C         | 4.262482  | 1.061523  | -0.489164 |   |           |           |           |
| C         | 3.074370  | 0.358997  | -0.272165 |   |           |           |           |
| N         | 1.764719  | 0.797865  | -0.394358 |   |           |           |           |
| C         | 0.911465  | -0.229134 | -0.089137 |   |           |           |           |
| C         | -0.472413 | -0.286863 | -0.072639 |   |           |           |           |

|   |           |           |           |  |  |  |
|---|-----------|-----------|-----------|--|--|--|
| C | -1.576991 | 0.734327  | -0.439419 |  |  |  |
| C | -2.808441 | -0.153657 | -0.342713 |  |  |  |
| C | -1.706973 | 1.895719  | 0.587965  |  |  |  |
| C | -0.691184 | 3.024178  | 0.485897  |  |  |  |
| C | -0.721803 | 4.074064  | 1.563331  |  |  |  |
| O | -1.451360 | 1.210550  | -1.759097 |  |  |  |
| O | 0.106744  | 3.087271  | -0.446364 |  |  |  |
| H | -4.412213 | 1.125909  | -1.004153 |  |  |  |
| H | -6.138207 | -0.636704 | -0.662375 |  |  |  |
| H | -5.499324 | -2.875371 | 0.167666  |  |  |  |
| H | -3.132968 | -3.424489 | 0.646870  |  |  |  |
| H | -0.906954 | -3.494523 | 0.811824  |  |  |  |
| H | 1.592990  | -3.473114 | 0.860163  |  |  |  |
| H | 4.307559  | -2.720212 | 0.632474  |  |  |  |
| H | 6.422393  | -1.482686 | 0.252697  |  |  |  |
| H | 6.392540  | 0.883469  | -0.450669 |  |  |  |
| H | 4.259489  | 2.100235  | -0.801511 |  |  |  |
| H | 1.466270  | 1.734105  | -0.642937 |  |  |  |
| H | -0.802614 | 1.935578  | -1.743474 |  |  |  |
| H | -1.722652 | 1.511882  | 1.614990  |  |  |  |
| H | -2.691037 | 2.360072  | 0.438148  |  |  |  |
| H | -0.356677 | 3.641833  | 2.503346  |  |  |  |
| H | -0.087397 | 4.915234  | 1.283554  |  |  |  |
| H | -1.744636 | 4.417058  | 1.750267  |  |  |  |

**Table S-5.** Frequencies of Conformers of Compound **2** at the B3LYP/6-31G\*\* Level in the Gas Phase.

| <b>Species</b> | <b>Frequencies (cm<sup>-1</sup>)</b>                                                                                                                                                                                                                                                                                                                                                                                                                                                                                                                                               |
|----------------|------------------------------------------------------------------------------------------------------------------------------------------------------------------------------------------------------------------------------------------------------------------------------------------------------------------------------------------------------------------------------------------------------------------------------------------------------------------------------------------------------------------------------------------------------------------------------------|
| <b>2a</b>      | 37 49 58 76 104 117 124 126 138 173 220 237 258 283 300 311 331 338<br>364 408 447 474 480 488 507 532 539 551 567 576 589 603 636 645 659<br>689 701 733 748 757 767 772 777 777 788 823 831 864 874 878 889 941<br>947 955 963 968 991 1003 1007 1013 1041 1053 1061 1097 1109 1136<br>1148 1157 1185 1188 1196 1200 1223 1241 1250 1258 1285 1317 1337<br>1353 1357 1370 1373 1392 1406 1416 1436 1457 1469 1476 1485 1491<br>1506 1513 1537 1563 1603 1627 1644 1667 1670 1701 1781 3040 3049<br>3099 3112 3176 3202 3207 3207 3215 3217 3224 3226 3230 3233 3267<br>3610 3642 |
| <b>2b</b>      | 33 47 56 61 99 108 112 114 148 187 189 218 241 279 295 301 324 334 364<br>384 412 447 467 477 486 491 509 535 559 564 575 580 607 629 646 656<br>686 714 748 755 766 767 775 785 791 824 835 854 874 884 886 938 947<br>952 960 962 971 1006 1008 1039 1042 1050 1061 1071 1111 1125 1147<br>1157 1185 1186 1193 1201 1226 1248 1249 1256 1266 1320 1340 1343<br>1352 1371 1374 1379 1394 1406 1422 1459 1472 1476 1487 1491 1506<br>1514 1537 1563 1605 1627 1650 1668 1671 1696 1809 3046 3052 3099<br>3112 3174 3202 3203 3207 3211 3216 3219 3226 3228 3234 3267 3659<br>3788  |
| <b>2c</b>      | 34 40 68 82 89 113 118 141 156 162 205 236 246 282 300 302 329 334 361<br>402 448 461 482 490 510 535 553 557 568 576 595 603 632 648 654 673<br>702 713 752 756 758 769 773 786 810 821 826 852 876 882 887 932 947<br>950 961 963 984 997 1006 1008 1040 1051 1060 1099 1111 1140 1151<br>1155 1185 1191 1197 1200 1213 1246 1258 1270 1275 1318 1339 1356<br>1364 1373 1376 1392 1406 1414 1427 1440 1467 1471 1483 1492 1507<br>1521 1537 1567 1606 1626 1651 1664 1672 1681 1762 3044 3052 3089<br>3114 3177 3201 3205 3206 3212 3217 3220 3225 3228 3234 3269 3571<br>3700   |
